# Supplementary material for: Cuprotosis Programmed-Cell-Death-Related lncRNA Signature Predicts Prognosis and Immune Landscape in PAAD Patients
Source: MDPI journal article supplement (doi:10.3390/cells11213436), 2022-10-31
Supplement: s1 [file s1]

**Supplementary Table S1.** The primer sequences for qPCR assay.

| Gene       | Forward primer            | Reverse primer                 |
|------------|---------------------------|--------------------------------|
| GAPDH      | TGACATCAAGAAGGTGGTGAAGCAG | GTGTCGCTGTTGAAGTCAGAGGAG       |
| AC005332.6 | ATCGCATGTGTCCTGTCTTCTGAAC | CCACTCGTGAGCACTGACAACCTG       |
| AC090114.2 | GTTCCACTGCCTTCTCCACACTTC  | GGTGGTGATGGTCGTGCTGTTC         |
| AL117382.1 | GGCAACCTGAAGAGATGTGGAGAC  | ATACTGCTGATGCGGACCAATGC        |
| LINC02041  | GGAGCCCAGCCAAGTAATGAAGC   | AATGAATCAGGACAGCCGTCAAG<br>TG  |
| LINC00857  | GCCTCCGTTAAGCACCAGAAGTC   | ATTGGGACAGGGTTTGGAACCTCTT<br>G |
